# Supplementary material
Source: publisher site journal article supplement (https://thieme-connect.com/media/10.1055-s-00035037/201504/supmat/10-3414-me-15-04-0003-supp.pdf)
Supplement: Supplementary file 1 [file 10-3414-me-15-04-0003-supp.pdf]

**Table 1**

The abbreviations that registered 20 or more occurrences in the 531 package inserts.

| <b>Abbreviations</b>     | <b>Full meaning</b>                                                            | <b>Number of occurrences</b> | <b>Number of package inserts</b> | <b>Maximum<sup>a</sup></b> | <b>Minimum<sup>b</sup></b> | <b>Average<sup>c</sup></b> | <b>Standard Deviation</b> |
|--------------------------|--------------------------------------------------------------------------------|------------------------------|----------------------------------|----------------------------|----------------------------|----------------------------|---------------------------|
| 1.<br>mg/ml <sup>d</sup> | <i>miligrama por mililitro</i><br>milligram per milliliter                     | 286                          | 102                              | 49                         | 1                          | 2.8                        | 5.4                       |
| 2.<br>THS <sup>e</sup>   | <i>Terapia de substituição hormonal</i><br>Hormone replacement therapy         | 193                          | 7                                | 56                         | 9                          | 27.6                       | 18.1                      |
| 3.<br>AINE <sup>e</sup>  | <i>Anti-inflamatório não esteroide</i><br>Non-steroidal anti-inflammatory drug | 148                          | 23                               | 31                         | 1                          | 6.4                        | 8.3                       |
| 4.<br>mg/kg <sup>d</sup> | <i>miligrama por quilograma</i><br>milligram per kilogram                      | 141                          | 46                               | 11                         | 1                          | 3.1                        | 2.4                       |

|     |                                         |     |    |    |   |     |     |  |
|-----|-----------------------------------------|-----|----|----|---|-----|-----|--|
| 5.  | <i>Anti-inflamatório não esteroide</i>  |     |    |    |   |     |     |  |
|     | AINEs <sup>e</sup>                      | 129 | 43 | 13 | 1 | 3   | 2.9 |  |
|     | Non-steroidal anti-inflammatory drugs   |     |    |    |   |     |     |  |
| 6.  | <i>miligrama por dia</i>                |     |    |    |   |     |     |  |
|     | mg/dia <sup>d</sup>                     | 106 | 40 | 16 | 1 | 2.7 | 3.3 |  |
|     | milligram per day                       |     |    |    |   |     |     |  |
| 7.  | <i>Vírus da imunodeficiência humana</i> |     |    |    |   |     |     |  |
|     | VIH                                     | 82  | 49 | 8  | 1 | 1.7 | 1.3 |  |
|     | Human immunodeficiency virus            |     |    |    |   |     |     |  |
| 8.  | <i>miligrama por grama</i>              |     |    |    |   |     |     |  |
|     | mg/g <sup>d</sup>                       | 77  | 40 | 14 | 1 | 1.9 | 2.1 |  |
|     | milligram per gram                      |     |    |    |   |     |     |  |
| 9.  | <i>mililitro por minuto</i>             |     |    |    |   |     |     |  |
|     | ml/min <sup>d</sup>                     | 67  | 37 | 6  | 1 | 1.8 | 1.3 |  |
|     | Millilitre per minute                   |     |    |    |   |     |     |  |
| 10. | <i>Espaço económico europeu</i>         |     |    |    |   |     |     |  |
|     | EEE                                     | 65  | 63 | 2  | 1 | 1   | 0.2 |  |

| European economic area |                   |                                                          |    |    |    |   |         |
|------------------------|-------------------|----------------------------------------------------------|----|----|----|---|---------|
| 11.                    | mg <sup>d</sup>   | <i>miligramo por</i><br>milligram per                    | 63 | 23 | 12 | 1 | 2.7 3   |
| 12.                    | mmol <sup>d</sup> | <i>milimoles</i><br>millimole                            | 59 | 51 | 4  | 1 | 1.2 0.5 |
| 13.                    | UI <sup>d</sup>   | <i>Unidades internacionais</i><br>International units    | 59 | 12 | 32 | 1 | 4.9 8.3 |
| 14.                    | pH                | <i>Potencial hidrogeniónico</i><br>Power of hydrogen     | 57 | 41 | 4  | 1 | 1.4 0.7 |
| 15.                    | SNC               | <i>Sistema nervoso central</i><br>Central nervous system | 55 | 28 | 7  | 1 | 2 1.5   |
| 16.                    | ECA <sup>e</sup>  | <i>Enzima conversora da</i><br><i>angiotensina</i>       | 47 | 26 | 11 | 1 | 1.8 2   |

|                      |                                                        |    |    |    |   |     |     |
|----------------------|--------------------------------------------------------|----|----|----|---|-----|-----|
| 17.                  | Angiotensin-converting enzyme                          |    |    |    |   |     |     |
|                      | <i>Inibidor da enzima de conversão da angiotensina</i> |    |    |    |   |     |     |
| IECA <sup>e</sup>    | Angiotensin-converting-enzyme inhibitor                | 46 | 25 | 3  | 1 | 1.8 | 0.9 |
| 18.                  | <i>miligrama por cinco mililitro</i>                   |    |    |    |   |     |     |
| mg/5 ml <sup>d</sup> | milligram per five millilitre                          | 42 | 8  | 20 | 1 | 5.3 | 6   |
| 19.                  | <i>Auriculoventricular</i>                             |    |    |    |   |     |     |
| AV                   | Auriculoventricular                                    | 41 | 8  | 20 | 1 | 5.1 | 5.9 |
| 20.                  | <i>Intramuscular</i>                                   |    |    |    |   |     |     |
| IM                   | Intramuscular                                          | 41 | 6  | 25 | 2 | 6.8 | 8.4 |
| 21.                  | <i>Inibidor da monoamina oxidase</i>                   |    |    |    |   |     |     |
| IMAO <sup>e</sup>    | Monoamine oxidase inhibitor                            | 38 | 26 | 3  | 1 | 1.5 | 0.7 |

|     |                                           |    |    |    |    |     |     |  |
|-----|-------------------------------------------|----|----|----|----|-----|-----|--|
| 22. | micrograma                                |    |    |    |    |     |     |  |
|     | $\mu\text{g}^{\text{d}}$                  | 37 | 10 | 10 | 1  | 3.8 | 2.7 |  |
|     | <i>microgram</i>                          |    |    |    |    |     |     |  |
| 23. | <i>Intravenoso</i>                        |    |    |    |    |     |     |  |
|     | IV                                        | 35 | 18 | 7  | 1  | 1.9 | 1.7 |  |
|     | Intravenous                               |    |    |    |    |     |     |  |
| 24. | <i>Doença coronária</i>                   |    |    |    |    |     |     |  |
|     | DC                                        | 35 | 1  | 35 | 35 | 35  | 0   |  |
|     | Coronary heart disease                    |    |    |    |    |     |     |  |
| 25. | <i>Electrocardiograma</i>                 |    |    |    |    |     |     |  |
|     | ECG                                       | 33 | 18 | 7  | 1  | 1.8 | 1.5 |  |
|     | Electrocardiography                       |    |    |    |    |     |     |  |
| 26. | <i>Specimens</i>                          |    |    |    |    |     |     |  |
|     | Spp.                                      | 32 | 5  | 2  | 11 | 6.4 | 3.7 |  |
|     | Specimens                                 |    |    |    |    |     |     |  |
| 27. | <i>Policloreto de vinila</i>              |    |    |    |    |     |     |  |
|     | PVC <sup>f</sup>                          | 28 | 23 | 4  | 1  | 1.2 | 0.7 |  |
|     | Polyvinyl chloride                        |    |    |    |    |     |     |  |
| 28. | <i>Doença pulmonar obstrutiva crónica</i> |    |    |    |    |     |     |  |
|     | DPOC                                      | 28 | 15 | 5  | 1  | 1.9 | 1   |  |

|                      |                                                       |    |    |    |   |     |     |
|----------------------|-------------------------------------------------------|----|----|----|---|-----|-----|
| 29.                  | Chronic obstructive<br>pulmonary disease              |    |    |    |   |     |     |
|                      | <i>Antagonista do receptor da<br/>angiotensina II</i> |    |    |    |   |     |     |
| AAII <sup>e</sup>    | Angiotensin II receptor<br>antagonist                 | 27 | 7  | 3  | 1 | 1.3 | 0.7 |
| 30.                  | <i>Unidades internacionais por<br/>mililitro</i>      |    |    |    |   |     |     |
| UI/ml <sup>d</sup>   | International Units per<br>millilitre                 | 26 | 6  | 19 | 1 | 4.3 | 6.6 |
| 31.                  | Inibidor da enzima de<br>conversão da angiotensina    |    |    |    |   |     |     |
| IECAs <sup>e</sup>   | Angiotensin-converting-<br>enzyme inhibitor           | 24 | 20 | 4  | 1 | 1.2 | 0.7 |
| 32.                  | <i>Policloreto de vinila/alumínio</i>                 |    |    |    |   |     |     |
| PVC/Alu <sup>f</sup> | Polyvinyl chloride                                    | 23 | 21 | 2  | 1 | 1.1 | 0.3 |

|     |                      |                                                                     |    |    |    |   |     |     |
|-----|----------------------|---------------------------------------------------------------------|----|----|----|---|-----|-----|
|     |                      | /aluminium                                                          |    |    |    |   |     |     |
| 33. | U.I. <sup>d</sup>    | <i>Unidades internacionais</i><br>International units               | 23 | 4  | 17 | 2 | 5.8 | 6.5 |
| 34. | mg/2 ml <sup>d</sup> | <i>miligramo por dois mililitro</i><br>milligram per two millilitre | 22 | 10 | 6  | 1 | 2.2 | 1.5 |
| 35. | mg/m <sup>2d</sup>   | <i>miligramo por metro quadrado</i><br>milligram per square meter   | 22 | 6  | 5  | 1 | 3.7 | 1.6 |
| 36. | g/dia <sup>d</sup>   | <i>grama por dia</i><br>gram per day                                | 21 | 15 | 4  | 1 | 1.4 | 0.9 |
| 37. | MAO                  | <i>Monoamina oxidase</i><br>Monoamine oxidase                       | 21 | 14 | 3  | 1 | 1.5 | 0.7 |
| 38. | HDPE <sup>f</sup>    | <i>Polietileno de alta densidade</i><br>High-density polyethylene   | 20 | 11 | 6  | 1 | 1.8 | 1.5 |

---

<sup>a</sup> Maximum occurrences of abbreviations per package insert

<sup>b</sup> Minimum occurrences of abbreviations per package insert

<sup>c</sup> Average number of abbreviations per package insert

<sup>d</sup> Abbreviations of units of measure

<sup>e</sup> Abbreviations related to therapeutic groups

<sup>f</sup> Abbreviations of chemical products
